# Supplementary material for: Suppression of LPS-Induced Inflammation and Cell Migration by Azelastine through Inhibition of JNK/NF-κB Pathway in BV2 Microglial Cells
Source: MDPI journal article supplement (doi:10.3390/ijms22169061), 2021-08-23
Supplement: s1 [file s1]

## Supplementary materials

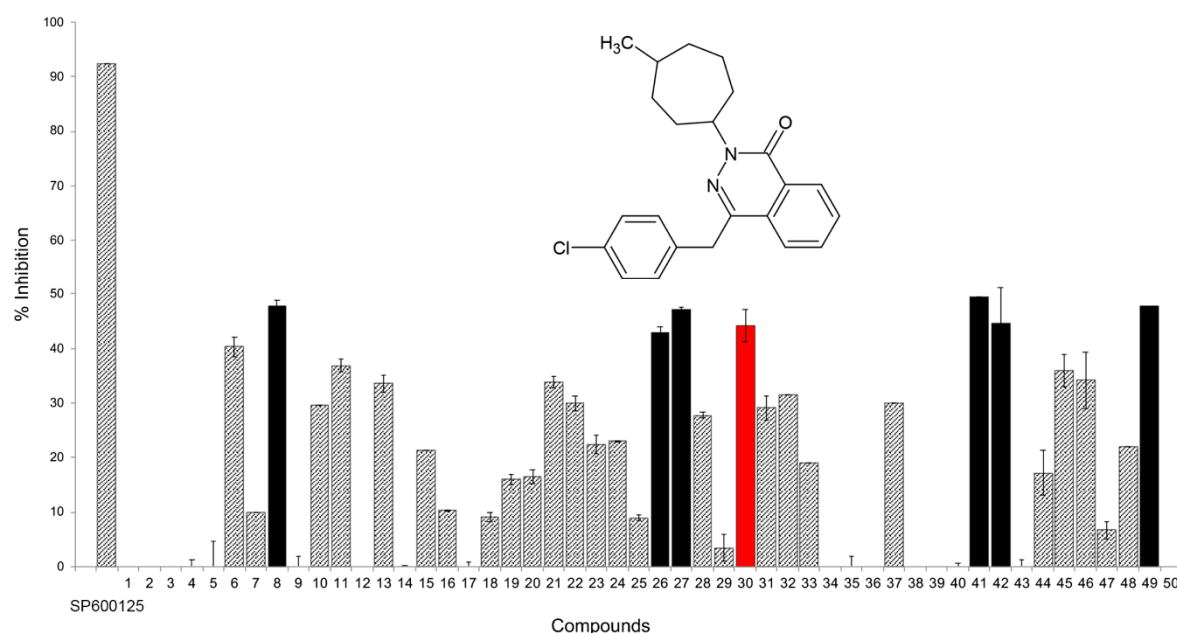

**Figure S1.** Percent inhibition of JNK3 activity by the selected 50 compounds. The activity of JNK3 was assessed in the presence of each test compound at the concentration of 10  $\mu$ M, as described in the Materials and methods. Seven compounds exhibited more than 40% inhibition of JNK3 activity. The effect of Aze (Compound No. 30) is highlighted in red, while the effects of the remaining six compounds are presented using filled bars. The % inhibition of JNK3 activity by SP600125 is also shown. Data are expressed as the mean  $\pm$  SEM. The structure of Aze is shown on the top of the figure.
